# Supplementary material
Source: publisher site journal article supplement (https://www.dovepress.com/article/389194)
Supplement: Supplementary file 1 [file get_supplementary_file.php]

**Supplementary Materials**

**Bioactive** **Nanocomposite Microsponges for the Reconstruction of Critical-sized Calvarial Defects in Rats**

Mohan Wang1, 2, Zheyuan Gu2, Beibei Li2, Jingyi Zhang2, Lu Yang2, Xianyu Zheng2, Faming Pan1,*, Jiacai He1,2,*

1 Department of Epidemiology and Biostatistics, School of Public Health, Anhui Medical University, Hefei, 230032, China

2 ﻿Stomatologic Hospital & College, Anhui Medical University, Key Laboratory of Oral Diseases Research of Anhui Province, Hefei 230032, China.

* Correspondence: famingpan@ahmu.edu.cn (F. P.), hejiacai@ahmu.edu.cn (J.H.)


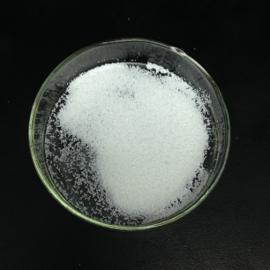


**Figure S1.** Digital photographs show the produced lyophilized CS-HAP microsponges.


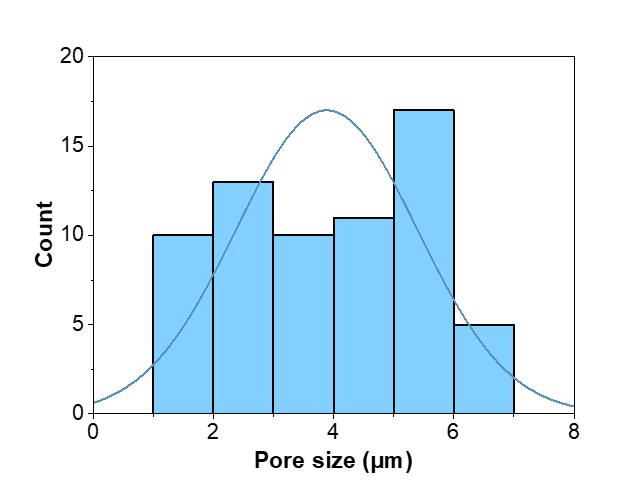


**Figure S2.** The pore size distribution of the CS-HAP microsponges, obtained by calculating them from SEM image, where at least 60 measurements were taken.


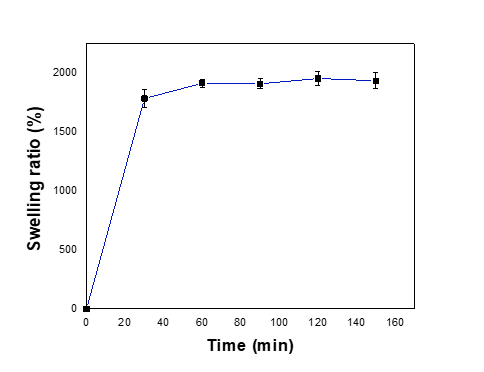


**Figure S3.** The swelling ratio of the CS-HAP microsponges, reaching up to ~ 1900%.


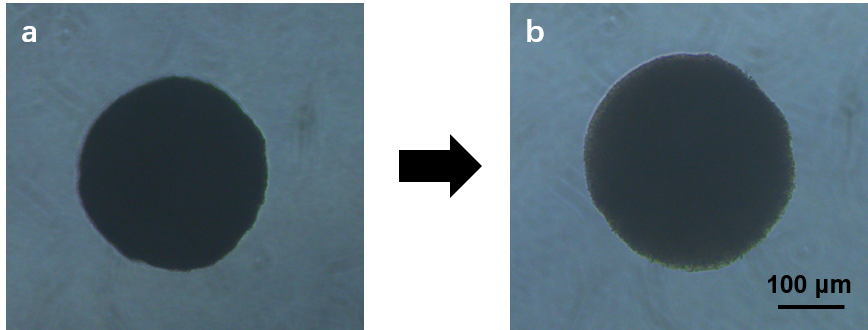


**Figure S4.** The volume change of the lyophilized CS-HAP microsponges after absorption in water. (a) Lyophilized CS-HAP microsponge. (b) The soaked CS-HAP microsponge.

**
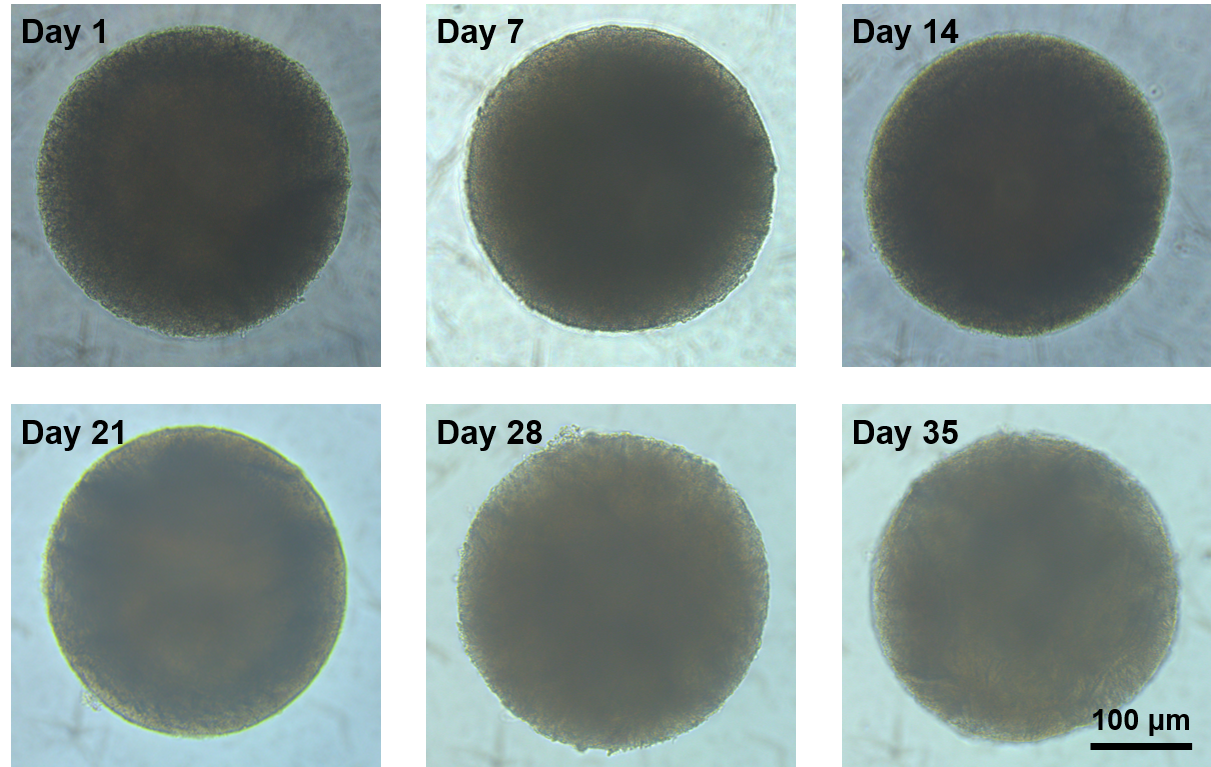
**

**Figure S5.** OPM images of the CS-HAP microsponges after being treated with lysozyme solution for different times.


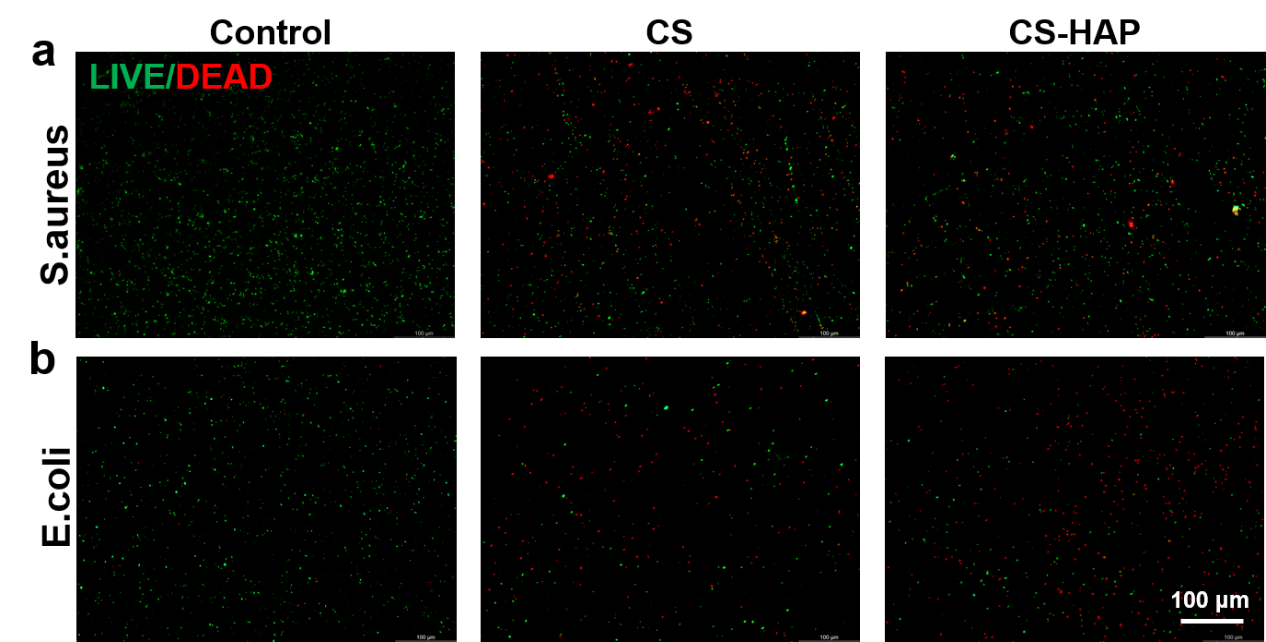


**Figure S6.** Fluorescent images of live/dead bacteria (green: live bacteria, red: dead bacteria). (a) *S. aureus.* (b) *E. coli.*


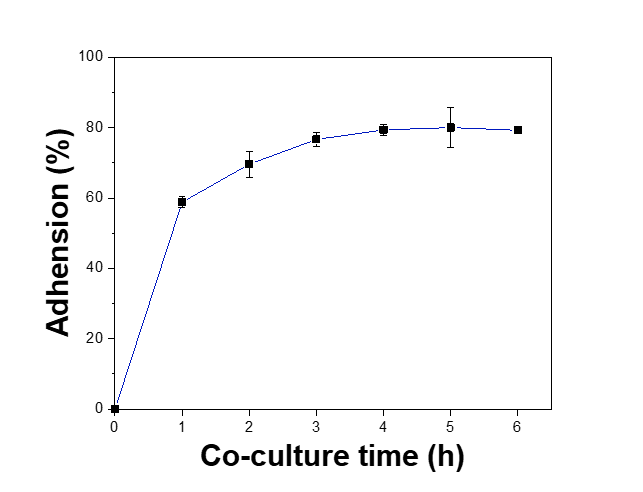


**Figure S7.** Adhesion efficiency of rBMSCs on the surface of CS-HAP microsponges.


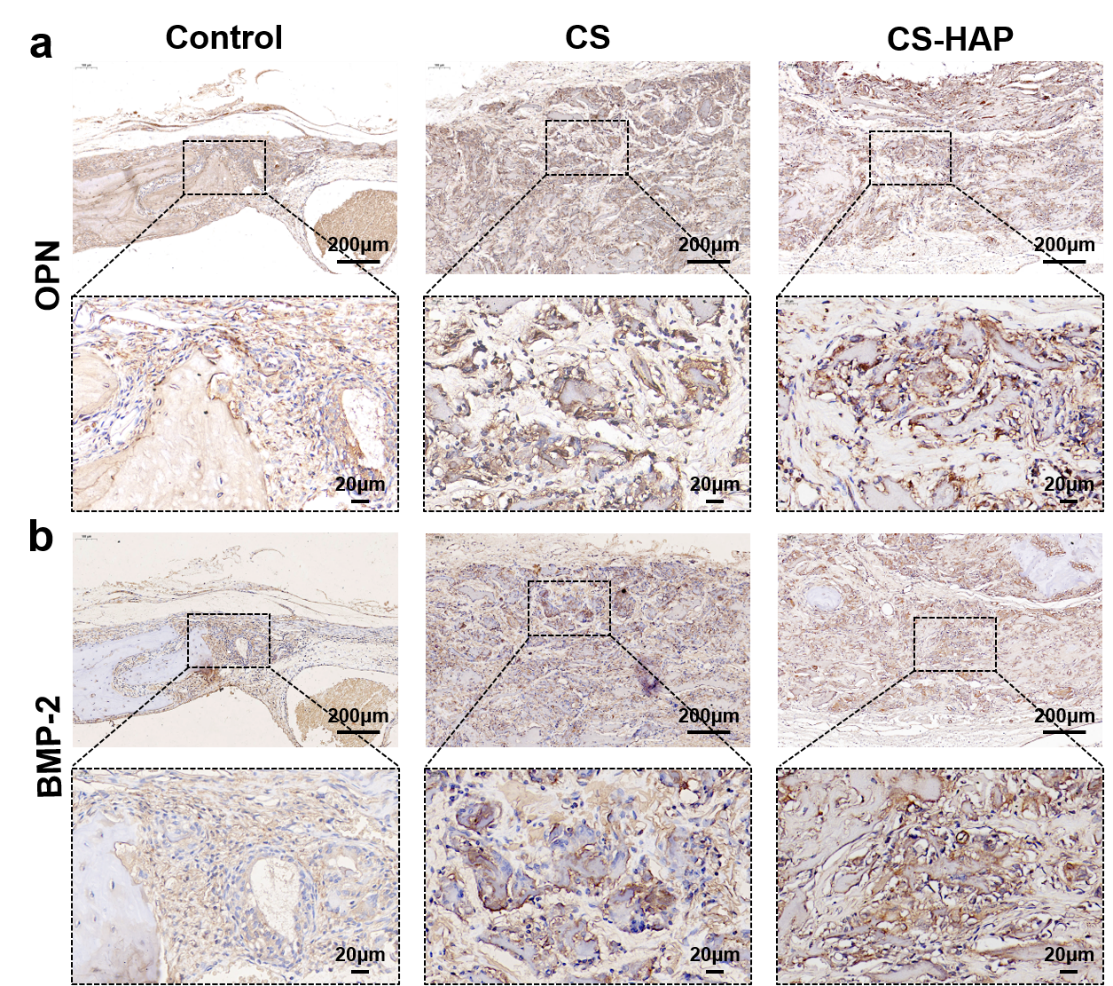


**Figure S8.** The immunohistochemical images of the representative osteogenic-related gene markers. (a) Representative micrographs of OPN expression. (b) Representative micrographs of BMP-2 expression.
